# Supplementary material for: Glucuronan lyases from family PL7 use a Tyr/Tyr syn β-elimination catalytic mechanism for glucuronan breakdown
Source: Royal Society of Chemistry journal article supplement (doi:10.1039/d3cc04256a), 2023-11-06
Supplement: d3cc04256a1.pdf [file d3cc04256a1.pdf]

## Supplementary Information

### Glucuronan lyases from family PL7 use a Tyr/Tyr syn $\beta$ -elimination catalytic mechanism for glucuronan breakdown

Marlene Vuillemin,<sup>a</sup> Bo Pilgaard,<sup>a</sup> Emma Kiehn,<sup>a</sup> Folmer Fredslund,<sup>b</sup> Ditte H. Welner,<sup>b</sup> Anne S. Meyer,<sup>a</sup> Finn L. Aachmann<sup>c</sup> and Casper Wilkens<sup>\*,a,d</sup>

<sup>a</sup> Department of Biotechnology and Biomedicine, Technical University of Denmark, Søtofts Plads, Building 224, DK-2800 Kgs. Lyngby, Denmark. E-mail: pdb@casperwilkens.dk

<sup>b</sup> Novo Nordisk Foundation Center for Biosustainability, Technical University of Denmark, Kemitorvet, Building 220, DK-2800 Kgs. Lyngby, Denmark.

<sup>c</sup> Norwegian Biopolymer Laboratory (NOBIPOL), Department of Biotechnology and Food Science, NTNU Norwegian University of Science and Technology, Trondheim, Norway

<sup>d</sup> Present address: Novo Nordisk Pharmatech, A/S, DK-4600 Køge, Denmark

### Materials and Methods

#### *$\beta$ -1,4-glucuronan*

Glucuronan ( $\beta$ -1,4-polyglucuronic acid) was prepared by TEMPO-mediated oxidation of grade 1 Whatman filter paper (Merck, Darmstadt, Germany). Prior to oxidation the filter paper was cut into small pieces and soaked in 5 M NaOH for 1.5 hours at room temperature. The NaOH solution was poured off and the filter paper rinsed with dH<sub>2</sub>O. This step was repeated three times. The oxidation was carried out as previously described<sup>1</sup> using TEMPO (2,2,6,6-tetramethylpiperidine-1-oxyl radical), sodium bromide and 11% sodium hypochlorite solution. The reaction time was adjusted to 30 min and reactions were spun down for 10 min to remove potential residual un-oxidized cellulose prior to quenching by ethanol 96% ethanol and washed twice in 70% acetone.

#### *TpPL7A and TpPL7B production and site-directed mutagenesis*

Mutants of TpPL7A (GenBank acc. nr. OTA00986.1) were constructed by Genscript (Piscataway, NJ, USA) and inserted into the pPICZ $\alpha$ A vector at the restriction sites EcoRI and Sall. Mutants of TpPL7B (GenBank acc. nr. OTA01262.1) were constructed using CloneAmp<sup>TM</sup> polymerase (Takara, Kusatsu, Japan), a set of mutagenic primers (Table S3), and pPICZ $\alpha$ A/TpPL7B as template<sup>2</sup>. Purified PCR products were used to transform *Escherichia coli* DH5 $\alpha$  and positive transformants were selected on LB low salt and zeocin (25  $\mu$ g/mL) plates. Corresponding plasmids were extracted using GeneJET Plasmid Miniprep Kit (ThermoFisher Scientific, Waltham, MA, USA) and all constructs were checked by sequencing (Macrogen Europe, Amsterdam, The Netherlands). For each mutant (of both TpPL7A and TpPL7B), a total of 5  $\mu$ g of plasmid was linearized by PmeI restriction enzyme and used to transform *Pichia pastoris* X-33 by electroporation. Transformants were selected on YPD and 100  $\mu$ g/mL zeocine plates. TpPL7A WT and mutants were produced in *P. pastoris* X-33 and purified by nickel affinity chromatography as described previously<sup>3</sup>. Imidazole was removed using PD-10 desalting columns and enzyme were stored in 20 mM Tris buffer with 100 mM NaCl. Purity of the enzymes was checked on SDS-PAGE and enzyme concentrations were determined by measuring the absorbance at 280 nm using a NanoDrop<sup>TM</sup> Lite Spectrophotometer (Thermo Fisher Scientific) and using the corresponding extinction coefficient of 28670 M<sup>-1</sup>·cm<sup>-1</sup> for TpPL7A and 26150 M<sup>-1</sup>·cm<sup>-1</sup> for TpPL7B.

#### *Enzyme activity assays and determination of kinetic parameters*

Glucuronan lyase activity was determined by following the absorbance at 235 nm for 10 min using a Multiskan GO spectrophotometer (Thermo Fisher Scientific). All reactions were carried out in triplicate at 40 °C in 50 mM UB4 buffer pH 7, 100 mM NaCl, for TpPL7A and 50 °C in 50 mM UB4 buffer pH5 for TpPL7B and using 1.5 g L<sup>-1</sup> of glucuronan and appropriate enzyme concentrations in 96-well quartz plates (Corning, New York, USA).

For each mutants, initial velocities were measured at different glucuronan concentrations ranging from 0.1 to 10 g L<sup>-1</sup> in the conditions stated above. Initial velocities in absorbance units (mAU) per second were converted to mM of  $\Delta$ 4,5 bonds formed per second using the extinction coefficient of 6368 M<sup>-1</sup> cm<sup>-1</sup>. Kinetic parameters were determined by fitting Michaelis-Menten model ( $v_0 = V_{max}/(1+(K_m/[S_0]))$ ) using Origin 2019 software (OriginLab Corporation, Northampton, MA, USA) where  $v_0$  is the initial velocity,  $[S_0]$  the initial substrate concentration,  $V_{max}$  the maximum rate, and  $K_m$  the Michaelis constant.

#### NMR spectroscopy

For the time course NMR analysis of lyase reactions, stock solutions of 10 mg/mL of  $\beta$ -glucuronan in 10 mM HEPES, pH 7.0 with 150 mM NaCl in D<sub>2</sub>O 99.9% was prepared. For each reaction 160  $\mu$ L of substrate buffer solution was added to 3 mm NMR tube and preheated to a temperature of 25 °C in the NMR instrument. 1D proton with water suppression spectrum was recorded to ensure that the sample had not undergone any degradation or contamination prior to the time-resolved NMR experiment. The reaction was started by adding 2  $\mu$ L of 0.2 nM of TpPL7A or 10  $\mu$ L of 4 nM of TpPL7B to preheated substrate and mixed by inverting the sample several times. The sample was hereafter inserted into the preheated NMR instrument and the experiment was started. The recorded spectrum is a pseudo-2D type experiment recording a 1D proton NMR spectrum every 2 min with a total of 64 time points (total experiment time 2 hrs 8 min). The recorded 1D proton with water suppression (noesygprr1d) contains 64K data points and has a spectral width of 10 ppm, 16 scans, and relaxation delay of 2.5 s (total recording time of 77s). After completion of the time-resolved experiment a <sup>1</sup>H-<sup>13</sup>C HSQC spectrum was recorded.

For the assignment of  $\beta$ -glucuronan following experiments were recorded: 1H (w/NOESY presaturation for solvent suppression), 2D <sup>1</sup>H-<sup>1</sup>H IP-COSY (In-phase correlation spectroscopy<sup>4</sup>), 2D <sup>1</sup>H-<sup>1</sup>H TOSCY (total correlation spectroscopy) using a 70 ms mixing time, <sup>1</sup>H-<sup>13</sup>C HSQC (heteronuclear single quantum coherence) with multiplicity editing, <sup>1</sup>H-<sup>13</sup>C H2BC (heteronuclear two bond coherence) and <sup>1</sup>H-<sup>13</sup>C heteronuclear multiple bond coherence (HMBC) with suppression of one-bond correlations. The chemical shift was reference to residual water signal <sup>1</sup>H: 4.75 ppm.

All NMR spectra were recorded on a BRUKER AVIIIHD 800 MHz instrument (Bruker BioSpin AG, Fällanden, Switzerland) equipped with 5 mm cryogenic TCI probe at 25 °C. The spectra were recorded, processed and analyzed using TopSpin 3.6pl7 and TopSpin 4.0.7 software (Bruker BioSpin AG, Fällanden, Switzerland).

#### *Crystallization, data collection and data processing*

TpPL7A was deglycosylated using EndoHf (New England Biolabs, Ipswich, MA, USA) overnight in 10 mM Tris, 150 mM NaCl pH 7 and EndoHf was subsequently separated from TpPL7A using Amylose Resin (New England Biolabs) column. TpPL7A was concentrated to 48 mg ml<sup>-1</sup> (10 kDa Amicon, Millipore) and crystallized in JCSG screen (Jena Bioscience, Jena, Germany) condition F9 containing 2.4 M disodium malonate pH 7 in a 96-well MRC 2-well plate by mixing 150 nl TpPL7A solution with 150 nl reservoir using a Crystal Gryphon robot (Art Robbins Instruments, Sunnyvale, CA, USA). A single crystal was obtained, which was dyed with Bright Red (Jena Bioscience) prior to cryocooling in liquid nitrogen. The crystal was cryoprotected with PEG400. Data were obtained at BioMAX at the Max IV Laboratory<sup>5</sup> and processed to 1.45 Å resolution with XDSAPP<sup>6</sup> (see Table S1 for statistics).

#### *Structure solution, model building and refinement*

To solve the structure of TpPL7A, a model was prepared from the closest homolog from the Protein Data Bank (www.pdb.org), which was the alginate lyase A1-II from *Sphingomonas* sp. A1 (PDB ID 2CWS)<sup>7</sup> identified through PDB-BLAST<sup>8</sup> with a coverage ~97% and identity of 30%. PHASER<sup>9</sup> from the PHENIX package<sup>10</sup> was used to perform molecular replacement, searching for one molecule in the asymmetric unit, and revealed the space group to be *P*4<sub>1</sub>2<sub>1</sub>2. A TFZ score of 15 was obtained. Initially the structure was built with PHENIX.autobuild<sup>11</sup> and then refined with PHENIX.refine<sup>12</sup> and manual model rebuilding in Coot<sup>13</sup> to a final  $R_{work}/R_{free}$  of 0.16/0.17 (see Table S1 for statistics).

### AlphaFold

The predicted structure of TpPL7B was obtained by AlphaFold<sup>14</sup>.

### Structural alignments and electrostatic plots

Structural alignments were obtained using PyMOL v. 2.5.4 (Schrödinger, LLC, New York; also used for rendering structural models). Electrostatic maps were obtained with the APBS-PDB2PQR software suite (<https://server.poissonboltzmann.org/>) using APBS v. 3.4.1 and PDB2PQR v. 3.6.1<sup>15</sup>.

### Sequence analyses

Multiple sequence alignment has been produced using Clustal Omega<sup>16</sup> and visualized with ESPript 3.0 server<sup>17</sup>.

### References

- 1 A. Isogai and Y. Kato, *Cellulose*, 1998, **5**, 153–164.
- 2 B. Pilgaard, M. Vuillemin, L. Munk, J. Holck, S. Meier, C. Wilkens and A. S. Meyer, *Appl Environ Microbiol*, 2022, **88**, e01819-21.
- 3 B. Pilgaard, C. Wilkens, F. Herbst, M. Vuillemin, N. Rhein-knudsen, A. S. Meyer and L. Lange, *Sci Rep*, 2019, **9**, 12338.
- 4 Y. Xia, G. Legge, K.-Y. Jun, Y. Qi, H. Lee and X. Gao, *Magnetic Resonance in Chemistry*, 2005, **43**, 372–379.
- 5 T. Ursby, K. A. Hnberg, R. Appio, O. Aurelius, A. Barczyk, A. Bartalesi, M. Bjelcic, F. Bolmsten, Y. Cerenius, R. B. Doak, M. Eguiraun, T. Eriksson, R. J. Friel, I. Gorgisyan, A. Gross, V. Haghighat, F. Hennies, E. Jagudin, B. N. Jensen, T. Jeppsson, M. Kloos, J. Lidon-Simon, G. M. A. D. Lima, R. Lizatovic, M. Lundin, A. Milan-Otero, M. M. Jie Nan, A. Nardella, A. Rosborg, A. Shilova, R. L. Shoeman, F. Siewert, P. Sondhauss, V. O. Talibov, H. Tarawneh, J. Thanell, M. Thunnissen, J. Unge, C. Ward, A. Gonzaleza and U. Muellera, *J Synchrotron Radiat*, 2020, **27**, 1415–1429.
- 6 K. M. Sparta, M. Krug, U. Heinemann, U. Mueller and M. S. Weiss, *J Appl Crystallogr*, 2016, **49**, 1085–1092.
- 7 K. Ogura, M. Yamasaki, B. Mikami, W. Hashimoto and K. Murata, *J Mol Biol*, 2008, **380**, 373–385.
- 8 S. F. Altschul, T. L. Madden, A. A. Schäffer, J. Zhang, Z. Zhang, W. Miller and D. J. Lipman, *Nucleic Acids Res*, 1997, **25**, 3389–3402.
- 9 A. J. McCoy, R. W. Grosse-Kunstleve, P. D. Adams, M. D. Winn, L. C. Storoni and R. J. Read, *J Appl Crystallogr*, 2007, **40**, 658–674.
- 10 P. D. Adams, P. V. Afonine, G. Bunkóczi, V. B. Chen, I. W. Davis, N. Echols, J. J. Headd, L. W. Hung, G. J. Kapral, R. W. Grosse-Kunstleve, A. J. McCoy, N. W. Moriarty, R. Oeffner, R. J. Read, D. C. Richardson, J. S. Richardson, T. C. Terwilliger and P. H. Zwart, *Acta Crystallogr D Biol Crystallogr*, 2010, **66**, 213–221.
- 11 P. V. Afonine, R. W. Grosse-Kunstleve, N. Echols, J. J. Headd, N. W. Moriarty, M. Mustyakimov, T. C. Terwilliger, A. Urzhumtsev, P. H. Zwart and P. D. Adams, *Acta Crystallogr D Biol Crystallogr*, 2012, **68**, 352–367.

- 12 T. C. Terwilliger, R. W. Grosse-Kunstleve, P. V. Afonine, N. W. Moriarty, P. H. Zwart, L. W. Hung, R. J. Read and P. D. Adams, *Acta Crystallogr D Biol Crystallogr*, 2007, **64**, 61–69.
- 13 P. Emsley, B. Lohkamp, W. G. Scott and K. Cowtan, *Acta Crystallogr D Biol Crystallogr*, 2010, **66**, 486–501.
- 14 K. Tunyasuvunakool, J. Adler, Z. Wu, T. Green, M. Zielinski, A. Žídek, A. Bridgland, A. Cowie, C. Meyer, A. Laydon, S. Velankar, G. J. Kleywegt, A. Bateman, R. Evans, A. Pritzel, M. Figurnov, O. Ronneberger, R. Bates, S. A. A. Kohl, A. Potapenko, A. J. Ballard, B. Romera-Paredes, S. Nikolov, R. Jain, E. Clancy, D. Reiman, S. Petersen, A. W. Senior, K. Kavukcuoglu, E. Birney, P. Kohli, J. Jumper and D. Hassabis, *Nature*, **596**, 590–596.
- 15 E. Jurrus, D. Engel, K. Star, K. Monson, J. Brandi, L. E. Felberg, D. H. Brookes, L. Wilson, J. Chen, K. Liles, M. Chun, P. Li, D. W. Gohara, T. Dolinsky, R. Konecny, D. R. Koes, J. E. Nielsen, T. Head-Gordon, W. Geng, R. Krasny, G. W. Wei, M. J. Holst, J. A. McCammon and N. A. Baker, *Protein Science*, 2018, **27**, 112–128.
- 16 F. Sievers and D. G. Higgins, *Protein Science*, 2018, **27**, 135–145.
- 17 X. Robert and P. Gouet, *Nucleic Acids Res*, 2014, **42**, 320–324.

**Table S1.** Data collection and refinement statistics for TpPL7A.

| <b>Enzyme</b>                          | <b>TpPL7A</b>                       |
|----------------------------------------|-------------------------------------|
| <b>PDB ID</b>                          | <b>7NDE</b>                         |
| <b>Data collection</b>                 |                                     |
| Resolution (Å)                         | 43.55–1.45 (1.50–1-45)              |
| Space group                            | <i>P4<sub>1</sub>2<sub>1</sub>2</i> |
| Unit cell                              |                                     |
| <i>a, b, c</i> (Å)                     | 69.6; 69.6; 111.7                   |
| Total no. of reflections               | 1293691 (125278)                    |
| No. of unique reflections              | 49303 (4791)                        |
| R <sub>merge</sub>                     | 0.07 (3.39)                         |
| R <sub>meas</sub>                      | 0.08 (3.45)                         |
| R <sub>pim</sub>                       | 0.01 (0.67)                         |
| CC <sub>1/2</sub>                      | 1 (0.44)                            |
| <i>I</i> / $\sigma$                    | 22.47 (0.87)                        |
| Completeness (%)                       | 99.98 (99.94)                       |
| Redundancy                             | 26.2 (26.1)                         |
| <b>Refinement</b>                      |                                     |
| Reflections used in refinement         | 49294 (4788)                        |
| Reflections used for R <sub>free</sub> | 2093 (203)                          |
| R <sub>work</sub>                      | 0.15 (0.29)                         |
| R <sub>free</sub>                      | 0.17 (0.31)                         |
| CC (work)                              | 0.98 (0.79)                         |
| CC (free)                              | 0.96 (0.78)                         |
| No. of refined non-hydrogen atoms      | 2051                                |
| Protein                                | 1847                                |
| Ligands                                | 18                                  |
| Solvent                                | 186                                 |
| <i>B</i> -factors                      | 31.45                               |
| Protein                                | 29.89                               |
| Ligands                                | 75.05                               |
| Solvent                                | 42.74                               |
| Wilson <i>B</i> -factor                | 25.87                               |
| r.m.s.d.                               |                                     |
| Bond lengths (Å)                       | 0.01                                |
| Bond lengths (°)                       | 0.94                                |
| Ramachandran plot                      |                                     |
| Favored (%)                            | 95.71                               |
| Allowed (%)                            | 3.86                                |
| Outliers (%)                           | 0.43                                |
| Rotamer outliers (%)                   | 1.48                                |
| No. of TLS groups                      | 8                                   |

**Table S2.** Kinetic parameters of TpPL7A and B and their mutants on  $\beta$ -glucuronan (n.d. = not detected under the assay conditions).

|                   | $K_M$ (g/L)     | $k_{cat}$ ( $s^{-1}$ ) | $k_{cat}/K_M$ ( $L \cdot s^{-1} g^{-1}$ ) |
|-------------------|-----------------|------------------------|-------------------------------------------|
| <b>TpPL7A</b>     | $3.1 \pm 0.02$  | $3119 \pm 10$          | 1006                                      |
| R99A              | n.d.            | n.d.                   | -                                         |
| R99K              | $0.65 \pm 0.02$ | $17.1 \pm 0.1$         | 26.3                                      |
| H137N             | $5.5 \pm 0.05$  | $1865 \pm 8.2$         | 339                                       |
| Q143A             | n.d.            | n.d.                   | -                                         |
| Q143N             | n.d.            | n.d.                   | -                                         |
| F145H             | $0.68 \pm 0.3$  | $12.3 \pm 0.3$         | 18.0                                      |
| E155A             | $0.4 \pm 0.00$  | $17.6 \pm 0.0$         | 44.0                                      |
| E155D             | $0.68 \pm 0.02$ | $40.3 \pm 0.2$         | 59.3                                      |
| E155R/Y157S       | $3.1 \pm 0.02$  | $0.5 \pm 0.0$          | 0.2                                       |
| F145H/E155R/Y157S | n.d.            | n.d.                   | -                                         |
| Y157F             | $2.9 \pm 0.0$   | $2863 \pm 1.0$         | 987                                       |
| Y157H             | $4.1 \pm 0.08$  | $1086 \pm 0.1$         | 265                                       |
| Q176A             | $1.8 \pm 0.03$  | $565.8 \pm 2.7$        | 314                                       |
| Q176N             | $8.3 \pm 0.2$   | $195.0 \pm 2.7$        | 23.5                                      |
| Y223F             | $2.5 \pm 0.2$   | $1511 \pm 45.5$        | 604                                       |
| Y229F             | n.d.            | n.d.                   | -                                         |
| K225A             | $0.62 \pm 0.03$ | $1.3 \pm 0.0$          | 2.1                                       |
| K225R             | $1.3 \pm 0.14$  | $1.7 \pm 0.1$          | 1.3                                       |
| <b>TpPL7B</b>     | $0.74 \pm 0.20$ | $23.8 \pm 3.1$         | 32.2                                      |
| H142A             | $1.2 \pm 0.04$  | $1.78 \pm 0.0$         | 1.5                                       |
| Y230F             | n.d.            | n.d.                   | -                                         |

**Table S3.** Primers used to constructs TpPL7B mutants, H142A and Y230F. Mutated codons are underlined.

| Primers        | Sequence                                                 |
|----------------|----------------------------------------------------------|
| TpPL7B_H142A_f | GTT ATT GGT CAA ATC <u>GCC</u> ATC GAT GAT TCT GTT TCT   |
| TpPL7B_H142_r  | GAT TTG ACC AAT AAC AGT ACC ATG ACC AGA AT               |
| TpPL7B_Y230F_f | C TTC AAG GTT GGT AAC <u>TTC</u> AAC CAA GGT TCT TCT GCT |
| TpPL7B_Y230_r  | GTT ACC AAC CTT GAA GTA AGA AGG TGG AGC ATC C            |

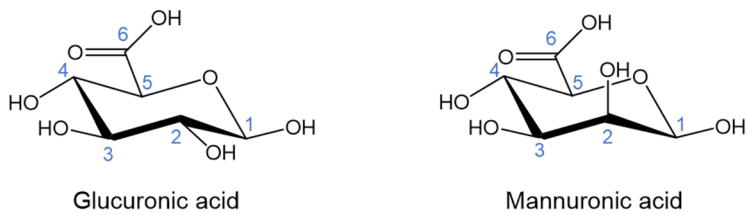

**Fig. S1.** Structures of glucuronic and mannuronic acids

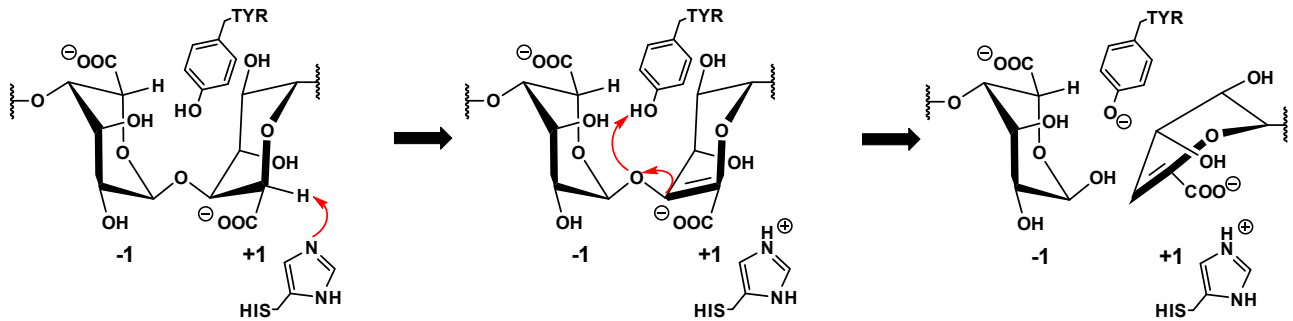

**Fig. S2.** His/Tyr anti  $\beta$ -elimination mechanism described for PL7 alginate lyases, depicted here with poly- $\alpha$ -L-guluronic acid.

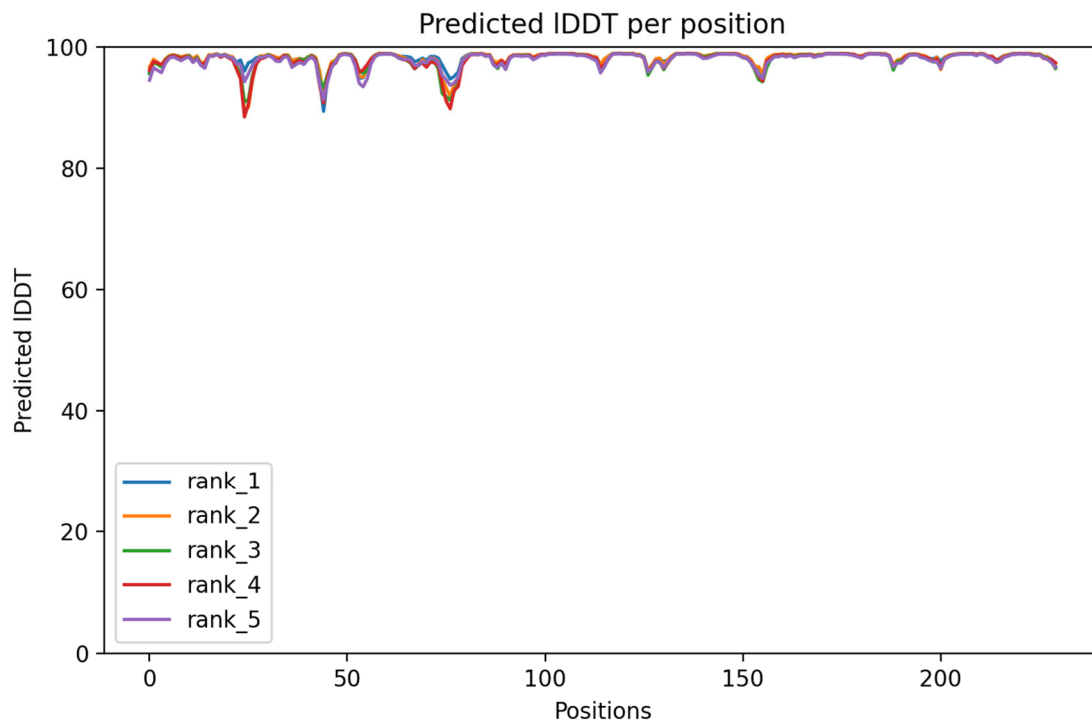

**Fig. S3.** AlphaFold model TpPL7B IDDT confident scores for the generated models. Regions with IDDT >90 are expected to be modelled to high accuracy<sup>14</sup>. Rank 1 is displayed in the manuscript.



A

OTA00986.1\_TpPL7A

OTA00986.1\_TpPL7A  
 OTA01262.1\_TpPL7B  
 ACU70527.1\_Caci\_1606  
 USW90871.1\_AlyV  
 VFY81779.1\_PsAlg7A  
 BAI66416.1\_AlyPyAly  
 CAZ95239.1\_AlyA1  
 WP\_053404615.1\_AlyQ  
 BAA83339.1\_alypG  
 5ZQI\_1\_AlgAT5  
 CAZ98266.1\_AlyA5  
 AAA25049.1|PL7|poly(alpha-L-gulonate)  
 BAP05660.1\_AlyAFLAlyA  
 BAD16656.1\_A1-II'Aly  
 AAG04556.1\_PA1167

β3 β4 α3 β5

67 FFT..DKSNGELIITAPGNPDITGCATTSGSEHCRTELREVDSATGQN.....TDWA  
 68 FFT..ESGDGALVVKVPGAPSNITGCVTTTPNSQHCRTTELRESNP.....SSWS  
 92 FYT..DTKDGAMTFWNAPEK....GVTTPNSNYARSELREMNT.DGSS..ADWK  
 72 FYV..DKASEALVFKMPGY.....KNRSEVRIYKFNVGE.....ADKYY  
 64 FYL..TS.DLYMQFQVAGS.....SQRSELREMETSGD.....EAWD  
 67 FY...SE.NRDMVFMGGD.....SQRSELRELD.....EWS  
 249 FYT..D..GEWVYFKCYRG.....LGGSSANSQNRVELREMDNGN..L..ASWT  
 315 Wfv..NEDKNAMVFRAPIR...SNGTTPNSSYVRSSELREKEDGSAD.....IYWT  
 77 FQV..NAKCTGVQFRAAVN...GVTTSGSGYPRESSELREMTDGGEEK.....ASWS  
 93 FHV..NDDGDVVFRAHCG...GDTTEGSSYPRSELREMTNDGQDK.....ASWS  
 74 FYVEHENETDWWFKTPNS...GITSRTSNTRTLELQK.....KHWI  
 65 FFT..LSDAGGMVFKAPIS...GAKTSKNTTYTRSELREMLRKGDTSIATQGVSRNNWV  
 75 MYD..DPKDKSVVFYAFPS...GVTTANTHYSTRSELRETMETGSKNK.....VNW  
 120 FYT..D.TDGAMTFWAPTT...GGTANSSYPRESSELREMLDPPSNK.....VNW  
 34 FQR..T.A.DGIRVWVPVN...GSHTRNSEFFPSELRETLSSGR.P.....YNWR

OTA00986.1\_TpPL7A

OTA00986.1\_TpPL7A  
 OTA01262.1\_TpPL7B  
 ACU70527.1\_Caci\_1606  
 USW90871.1\_AlyV  
 VFY81779.1\_PsAlg7A  
 BAI66416.1\_AlyPyAly  
 CAZ95239.1\_AlyA1  
 WP\_053404615.1\_AlyQ  
 BAA83339.1\_alypG  
 5ZQI\_1\_AlgAT5  
 CAZ98266.1\_AlyA5  
 AAA25049.1|PL7|poly(alpha-L-gulonate)  
 BAP05660.1\_AlyAFLAlyA  
 BAD16656.1\_A1-II'Aly  
 AAG04556.1\_PA1167

β6 β7 η2

117 PAGT.....NTLTVAMKVI....QADD..GSHGTAIGOVFAA.....  
 113 PNNP.....NNKLVSLAVE....QPDN..SGHVTVIGOHID.D.....  
 136 LAGS.....HQLQATLRV....DS..VDHVCVGQIHG.T.....  
 110 HLGA.....EIKPNPRASVANTDKAKN....DAITVYLQVHNAGSVSADFPDG  
 99 CTGS.....TAHVSAQIAIPVQEDGI....EEVTILQVHDS.....  
 95 VRTS.....STRMVGVLTLPPLRGM....KHFVWQVHGGSK.....  
 290 GDSS.....THTMEWTVQVNLQPDQDGD....GGVLCFQIHGPKNSD.....  
 362 T.TG.....THVYVVKQATQLPQIVKDH....LVATQIHGDKSAG.....  
 122 ATSG.....THTVVFREAENHLEPVKPH....LVGACIHD....G.....  
 138 TTSG.....THTMIDQKITHLPEVKDH....VVVVGCIHD....S.....  
 114 PETG.....GKLNATLKVQHVSTSGDARVAASYSVVVVGCIHSDEG.....  
 119 LSSAPLSEQKAGVDGTLLEATLSVDHVTITGVNWN..QVGRVIGCIHANND.....  
 120 FAKG.....G.KMRGTYADDISK.EPDG..KYSRVIIACIHGVLTDQR..DL  
 164 WQGT.....HT.MKLSGKTV....QLPS...SGKIIIVACIHGIMD.....  
 76 YARA.....DNWLEATLRE....AVPS...TRRMIIQCIHSDGS.....

OTA00986.1\_TpPL7A

OTA00986.1\_TpPL7A  
 OTA01262.1\_TpPL7B  
 ACU70527.1\_Caci\_1606  
 USW90871.1\_AlyV  
 VFY81779.1\_PsAlg7A  
 BAI66416.1\_AlyPyAly  
 CAZ95239.1\_AlyA1  
 WP\_053404615.1\_AlyQ  
 BAA83339.1\_alypG  
 5ZQI\_1\_AlgAT5  
 CAZ98266.1\_AlyA5  
 AAA25049.1|PL7|poly(alpha-L-gulonate)  
 BAP05660.1\_AlyAFLAlyA  
 BAD16656.1\_A1-II'Aly  
 AAG04556.1\_PA1167

β8 β9

148 .....AASKPLAEMYYS....QKGDITVGVKQGPS.....  
 146 .....SVSTKPVCELYYN....SSGVLAMGVEQTRS.....  
 165 .....GGSSTKPLVELLYY....KNGNIVLGEENSPS.....  
 154 VSGEGYIPHLVLRVVVEA....ERSGK...NDWYWAVIKNN..AVNCGSK  
 132 .....DVTPLRLISVVS....SITIDGVTSEDVVLTATIR....NGID  
 130 .....GKKPLRLSLWHD....KREQGKDLRNTMLATVR....LNNK  
 331 .....GVEVDVVVVFQFGEENQSSGSVKLKISGYVT.....  
 397 .....IDDAMVMRLEGNHLF....ASFNGG.....  
 154 .....DDVTVFERLEGTSLY....ITKGGD.....  
 170 .....DDVTMIRLEGNHLF....VEG.DG.....  
 154 .....HENEP..IKIFYKFKFPGHGKGSVFWNYEINTKGDNSKRWDYSTAVWGYDMSVVG  
 169 .....EP..IRLYYKRLPHHQKGSVYFAHEPRKG....FGDEQWYEMIGTLQPS  
 163 IGQKDNNAPIILKVVYWD....KGIKIRVKTIVLKD....LN.APYKEML...SE  
 196 .....DGTNAPPLVKAVFQ....DGQLDMQVVKQNSD.....  
 109 .....NSGQAAPLVKLLQLR..LDQGRVQALVREPRD.....

R99

H137

F145

Q143

E155

Y157

OTA00986.1\_TpPL7A

OTA00986.1\_TpPL7A  
 OTA01262.1\_TpPL7B  
 ACU70527.1\_Caci\_1606  
 USW90871.1\_AlyV  
 VFY81779.1\_PsAlg7A  
 BAI66416.1\_AlyPyAly  
 CAZ95239.1\_AlyA1  
 WF\_053404615.1\_AlyQ  
 BAA83339.1\_alyPG  
 5ZQI\_1\_AlgAT5  
 CAZ98266.1\_AlyA5  
 AAA25049.1|PL7|poly(alpha-L-gulonate)  
 BAP05660.1\_AlyAF1AlyA  
 BAD16656.1\_A1-II'Aly  
 AAG04556.1\_PA1167

β10 → TT \* β11 → T.T β12 → T.T β13 →

174 .....GNQAITKLGTVPLGTYFTYIMSYSD.DVLSISIN.GN.KT.....TL.  
 173 .....GGNEIITPVGNVPGQPFYITISYSS.NVLSVSIIN.GGAAQ.....TL.  
 193 .....GG.QTTHQIANVPGTQWSYTIAVSGGNTINLIVN.GKITK.....YA.  
 195 SGNKGTEECKNAYLKLPIAPIAKEGTKFDIYVGG.NKLIINHNDKTA.I.NH.....  
 166 DS...TA.....TKIVLQAHITSRTEFNINVQN.SKLSITVDGTTIELD.EA.....  
 164 SGDAGR.....KKIVLGTRPSGRFVADVVER.SRLTIVRLNKRKL.V.DE.....  
 363 .....EEQGGSQTFSGYSLDITTYNCKLVYSG.GYVELFMNGSSVFRKKM.....  
 418 .....KLRSDLTIKTNYNLGTVHEVIFEVIN.GKHLYLYSEDDGLAEAY.ANGSAA  
 175 .....TH..HKLVTSDYKLNNTVFEKGFVVS.G.GKIKVYYNGVLQTT.....  
 190 .....EE..LADLDTDYELGTRFTVKIVASG.GKIKVYYNGDLKLT.....  
 207 .....T...ATSYPEEPEDGIALGEEFSYIEINVE.GIMYLTFSSSEGHKIKFTKNLLKS  
 212 HGN.....QTAAPTEPEAGIALGETFSYRIDATG.NKLTIVTLNREGRPDVVKTVDMSK.  
 204 HAW.....GDDEGRNFKEKIDLNTRFTLEVKVSD.GRMEVILN.DTESLVYD...DI.  
 223 ..G.....TGSDDVHNYFTGIKLGDLLYNMEIRVTD.GVAYVTNN.GDTRSVDF...VG.  
 140 ..D.....GGTRAYTLMGDGIPLGQPFYSYRIGVSRSGLLSVSVN.GSALE.....QQ.

↑  
 Q176

OTA00986.1\_TpPL7A

OTA00986.1\_TpPL7A  
 OTA01262.1\_TpPL7B  
 ACU70527.1\_Caci\_1606  
 USW90871.1\_AlyV  
 VFY81779.1\_PsAlg7A  
 BAI66416.1\_AlyPyAly  
 CAZ95239.1\_AlyA1  
 WF\_053404615.1\_AlyQ  
 BAA83339.1\_alyPG  
 5ZQI\_1\_AlgAT5  
 CAZ98266.1\_AlyA5  
 AAA25049.1|PL7|poly(alpha-L-gulonate)  
 BAP05660.1\_AlyAF1AlyA  
 BAD16656.1\_A1-II'Aly  
 AAG04556.1\_PA1167

TT \* β14 →

213 .....DTFSWGTPNCFYFKSGNYNGKTAVT.....  
 214 .....STYSLDAPPSYFKVGNYNQSSSAS.....  
 234 .....IPSSFNAYHMYFKAGSYNQSST.....TKG  
 245 .....DITYWNEKKSFKAGVYNQFNGE.....  
 207 .....DISQFDGSTCYFKAGAYNNNP.TDTS.....AN  
 207 .....DVGWYTYSTNYFKAGVYVREGSPD.....  
 406 .....EVDLDSLENYFKVGNYLQVSK..GASYT...GSY  
 467 .....A...YLIKDGGNDYVMDLNYDQSYFKIGNYTCNSSEKESYTGDPNNY  
 213 .....ISHTSSGNYFKAGAYTCANCSNSSPC..SSSNY  
 228 .....YNKSVSGCYFKAGMYTCSTNSKSGD...SEDAY  
 258 NFKTKSDIPQQIKTLYASIGRDGIERENAYAGEIQFKLGAAYNCINCKSP...EDN  
 264 .....SGYSEAGQYLFKAGVYNNKTKGP...DDY  
 251 .....HMKKWGIFENYFKAGNYFQSKTPGT...F  
 268 .....KDAGWKNLKYFKAGNYVDQNTSTG...GSA  
 183 .....LDPQWAYQGLYFKAGLYLDNRRGPPS...SEG

↑ ↑ ↑  
 Y223 K225 Y229

B

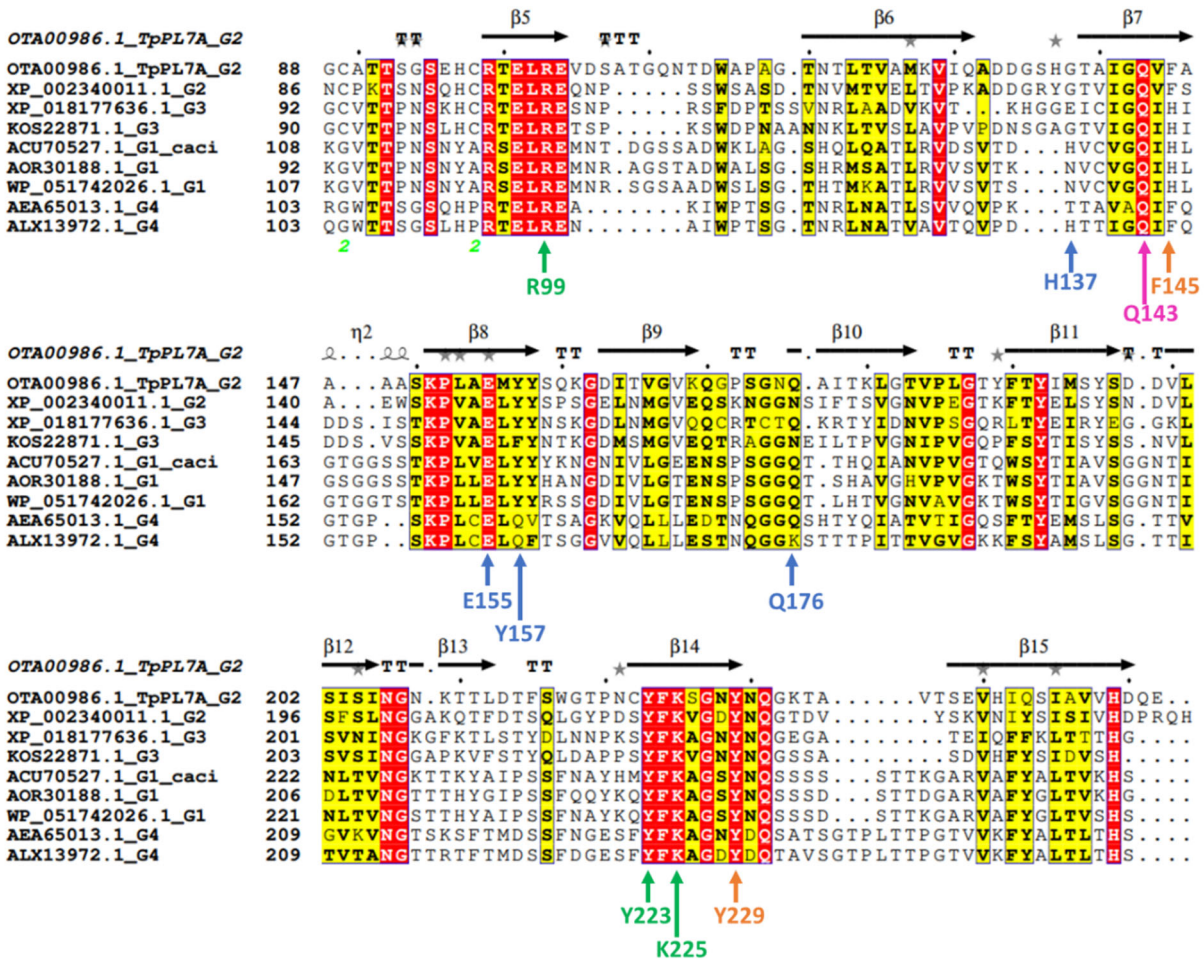

**Fig. S4.** A; Selected part of the multiple sequence alignment of protein sequences from PL7 family and B; multiple sequence alignment of protein sequences from subfamily PL7\_4. Alignment has been prepared with ClustalO and visualized in ESPrpt using TpPL7A 3D structure (PDB 4NDE) to render secondary structure elements. Fully conserved positions are highlighted in red and partially conserved and highly similar positions are highlighted in yellow. The key residues amino acids mutated in TpPL7A are indicated by different arrows and using TpPL7A numbering. Orange arrows represent catalytic amino acids. Amino acids from the minus subsites are indicated in blue and amino acids from the plus subsites are indicated in green. The glutamine playing the role of the neutralizer in the  $\beta$ -elimination mechanism is indicated in by a pink arrow.

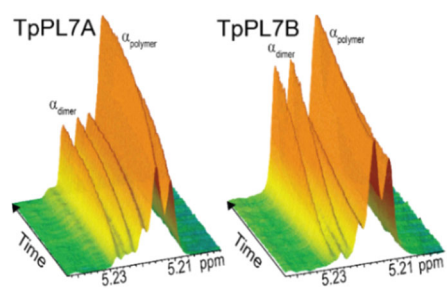

**Fig S5.** Time Course NMR for TpPL7A and TpPL7B recorded at 25 °C and at 800 MHz for 2 hours. Only the regions for  $\alpha$ -reducing end are shown, and the assignment of the signals are indicated.

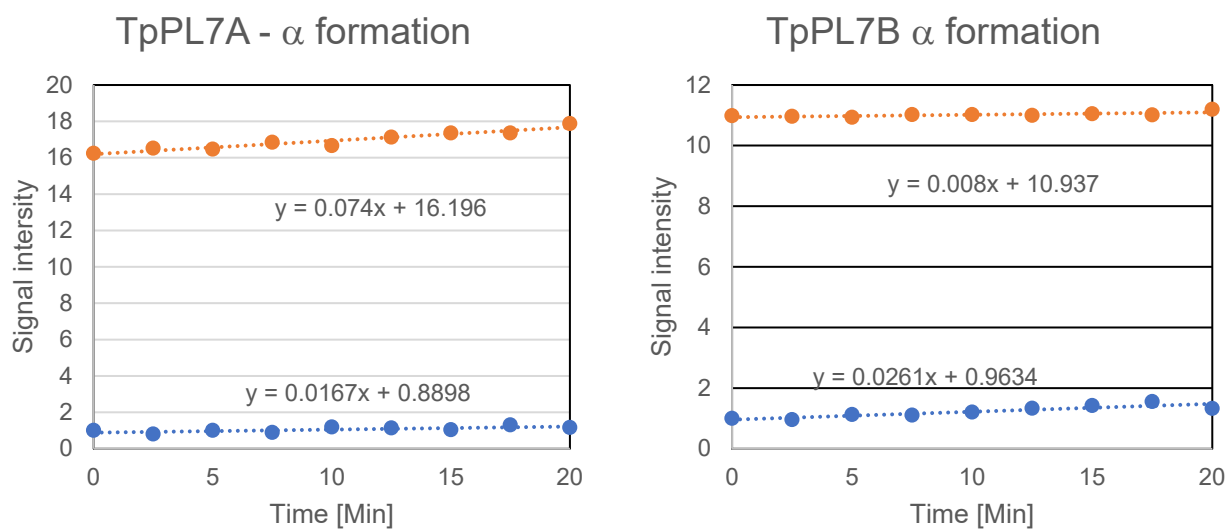

**Fig. S6.** The signals intensity of  $\alpha$ -reducing ends for first 20 min with TpPL7A and TpPL7B. The intensity of  $\alpha$ -dimer (blue dots) and  $\alpha$ -polymer (orange dots) is plotted as the function of time and formation rate is estimated from the slope of the dotted lines. For TpPL7A makes 31% as  $\alpha$ -dimer and 69%  $\alpha$ -polymer, while TpPL7B generates 77% as  $\alpha$ -dimer and 23% as  $\alpha$ -polymer.

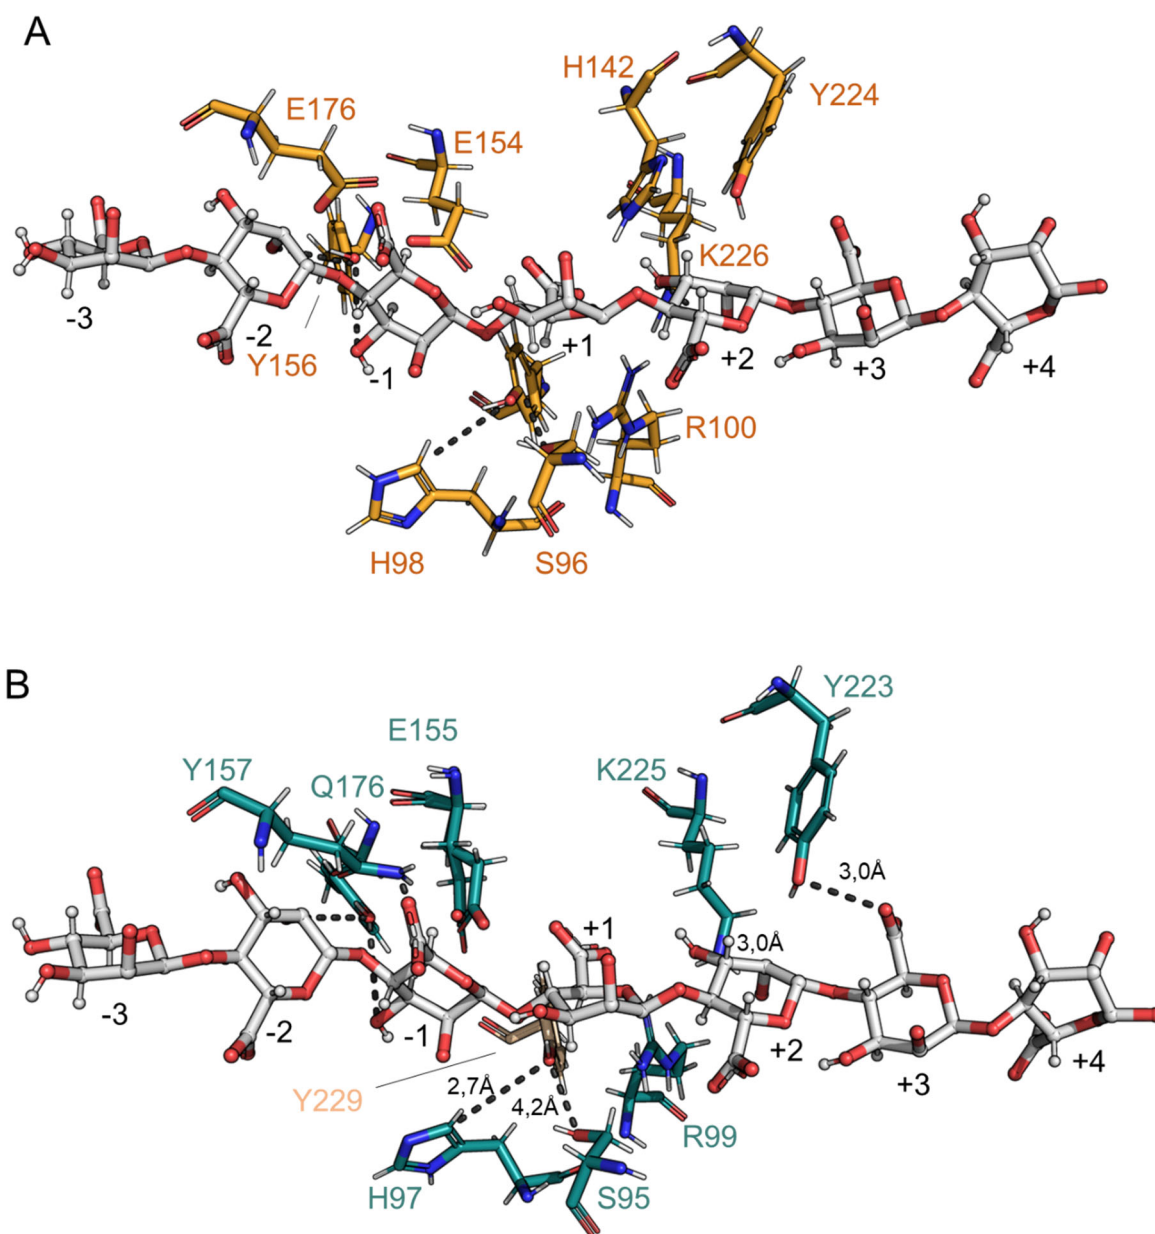

**Fig. S7.** Closer look on the active sites and hydrogen bonds of A) TpPL7B and B) TpPL7A, both in complex with hexamannuronic acid (stick representation in white) taken from PsAlg7A 3D structure (PDB 7NCZ).
